# Supplementary material
Source: PubMed Central journal article supplement (PMC3530871)
Supplement: 97320630081195S1.pdf [file 97320630081195S1.pdf]

## Supplementary material:

**Table 1:** Comparative study representation of drug likeness and biochemical properties, docking score (using Hex and Quantum) and binding pocket analysis for AhG compounds vs. bench mark drug satisfying Protein-Ligand Interaction study (Stage I and II).

| Sl. No.  | Name of the plant (the compound)                                                | Chemical properties of the compound                                                                                                                                                          | Docking score                                                                                                                                                                                                      | Binding Analysis                                                                                                                                                                                                                                      | Pocket                                                                                                             |
|----------|---------------------------------------------------------------------------------|----------------------------------------------------------------------------------------------------------------------------------------------------------------------------------------------|--------------------------------------------------------------------------------------------------------------------------------------------------------------------------------------------------------------------|-------------------------------------------------------------------------------------------------------------------------------------------------------------------------------------------------------------------------------------------------------|--------------------------------------------------------------------------------------------------------------------|
| Std Drug | Flax plant (Glipizide)<br>Structure of the compound<br>CID: 3478                | 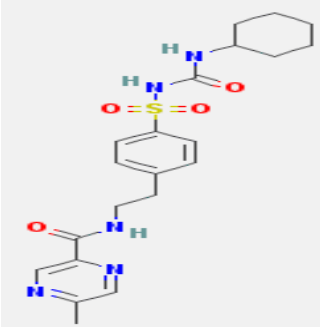<br><b>Canonical smile:</b><br><chem>CC1=NC=C(N=C1)C(=O)NCCCC=CC=C(C=C2)S(=O)(=O)NC(=O)NC3CCCCC3</chem>     | <b>Lipinski Rule:</b><br>Molecular Weight : 445.53518 [g/mol]<br>Molecular Formula : C <sub>21</sub> H <sub>27</sub> N <sub>5</sub> O <sub>4</sub> S<br>XLogP3-AA : 1.9<br>H-Bond Donor : 3<br>H-Bond Acceptor : 6 | <b>Hex Score:</b><br><br><b>Energy minimized (Kcal/mol)</b><br>151.85<br><b>Docking results (E-Total)</b><br>-257.66<br><b>Quantum Score:</b><br><br><b>Gibbs free energy (kcal/mol)</b><br>-19.38<br><b>Root Mean Square Deviation (A°)</b><br>47.39 | <b>Amino acid base</b><br>LEU 32<br><b>Rank:</b><br><br><b>H-Bond distance (A°)</b><br>1.63                        |
| 1.       | Aloe barbadensis (Aloins)<br>Structure of the compound<br>CID: 221037           | <br><b>Canonical smile:</b><br><chem>C1=CC=C2C(=C1)C(=O)C3=CC(=CC(=C3C2=O)OCC(C(C(=O)O)O)O)CO</chem>       | <b>Lipinski Rule:</b><br>Molecular Weight : 386.35212 [g/mol]<br>Molecular Formula : C <sub>26</sub> H <sub>18</sub> O <sub>8</sub><br>XLogP3-AA : -0.4<br>H-Bond Donor : 4<br>H-Bond Acceptor : 8                 | <b>Hex Score:</b><br><br><b>Energy minimized (Kcal/mol)</b><br>50.12<br><b>Docking results (E-Total)</b><br>-260.48<br><b>Quantum Score:</b><br><br><b>Gibbs free energy (kcal/mol)</b><br>-20.07<br><b>Root Mean Square Deviation (A°)</b><br>25.92  | <b>Amino acid base</b><br>GLU 30<br><b>Rank:</b><br>FOURTH<br><br><b>H-Bond distance (A°)</b><br>2.50              |
| 2.       | Capparis decidua (Capparisin-ine)<br>Structure of the compound<br>CID: 16058118 | <br><b>Canonical smile:</b><br><chem>COC1=CC2=CC(=C1C=CC(=O)NCCCCNCCCNC(=O)C=CC3=CC(=C(C=O)O)O2)OC</chem> | <b>Lipinski Rule:</b><br>Molecular Weight : 495.56742 [g/mol]<br>Molecular Formula : C <sub>27</sub> H <sub>33</sub> N <sub>3</sub> O <sub>6</sub><br>XlogP3-AA : 3<br>H-Bond Donor : 4<br>H-Bond Acceptor : 7     | <b>Hex Score:</b><br><br><b>Energy minimized (Kcal/mol)</b><br>150.29<br><b>Docking results (E-Total)</b><br>-283.00<br><b>Quantum Score:</b><br><br><b>Gibbs free energy (kcal/mol)</b><br>-20.40<br><b>Root Mean Square Deviation (A°)</b><br>32.96 | <b>Amino acid base</b><br>GLY 59<br><b>Rank:</b><br>THIRD<br><br><b>H-Bond distance (A°)</b><br>1.73               |
| 3.       | Desmodium Gangeticum (Daturilinol)<br>Structure of the compound<br>CID: 5316315 | <br><b>Canonical smile:</b><br><chem>CC12CCC3C(C1CCC2C4COC5(CC4OC(=O)C5CO)C)CC=C6C3(C(=O)C=CC6)C</chem>   | <b>Lipinski Rule:</b><br>Molecular Weight: 454.59832 [g/mol]<br>Molecular Formula: C <sub>28</sub> H <sub>38</sub> O <sub>5</sub><br>XLogP3-AA: 4.8<br>H-Bond Donor: 1<br>H-Bond Acceptor: 5                       | <b>Hex Score:</b><br><br><b>Energy minimized (Kcal/mol)</b><br>371.14<br><b>Docking results (E-Total)</b><br>-267.19<br><b>Quantum Score:</b><br><br><b>Gibbs free energy (kcal/mol)</b><br>-11.16<br><b>Root Mean Square Deviation (A°)</b><br>26.69 | <b>Amino acid base</b><br>LEU 32, GLY 59<br><b>Rank:</b><br>SIXTH<br><br><b>H-Bond distance (A°)</b><br>1.60, 1.70 |

|    |                                                                                       |                                                                                     |                                                                                                                                                                                                                                                                                                                                                                                    |                                                                                                                                                                  |                                                                                                                                                                      |                                              |                                                |
|----|---------------------------------------------------------------------------------------|-------------------------------------------------------------------------------------|------------------------------------------------------------------------------------------------------------------------------------------------------------------------------------------------------------------------------------------------------------------------------------------------------------------------------------------------------------------------------------|------------------------------------------------------------------------------------------------------------------------------------------------------------------|----------------------------------------------------------------------------------------------------------------------------------------------------------------------|----------------------------------------------|------------------------------------------------|
| 4. | Senna occidentalis (L.)<br>(Funiculosin)<br>Structure of the compound<br>CID: 6444332 | 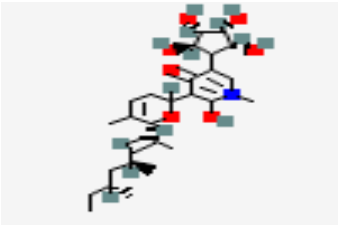   | <p><b>Lipinski Rule:</b><br/>Molecular Weight : 491.61694 [g/mol]<br/>Molecular Formula : C<sub>27</sub>H<sub>41</sub>NO<sub>7</sub><br/>XLogP3-AA: 2.1<br/>H-Bond Donor: 5<br/>H-Bond Acceptor: 8</p> <p><b>Chemical/Bio-activity</b><br/>miLogP: 2.323<br/>GPCR ligand: 0.20<br/>Ion channel Modulator: -0.03<br/>Kinase inhibitor: -0.06<br/>Nuclear receptor Ligand: 0.28</p>  | <p><b>Hex Score:</b></p> <p><b>Energy minimized (Kcal/mol)</b><br/>91.58</p> <p><b>Quantum Score:</b></p> <p><b>Gibbs free energy (kcal/mol)</b><br/>-37.52</p>  | <p><b>Amino acid base</b></p> <p><b>Docking results (E-Total)</b><br/>-269.31</p> <p><b>Rank: FIRST</b></p> <p><b>Root Mean Square Deviation (A°)</b><br/>38.95</p>  | <p><b>H-Bond (A°)</b><br/>GLU 13</p>         | <p><b>distance</b><br/>1.21</p>                |
| 5. | Senna occidentalis (L.)<br>(Rhein)<br>Structure of the compound<br>CID: 101168        |    | <p><b>Lipinski Rule:</b><br/>Molecular Weight: 284.22042 [g/mol]<br/>Molecular Formula: C<sub>15</sub>H<sub>8</sub>O<sub>5</sub><br/>XLogP3-AA: 2.2<br/>H-Bond Donor: 3<br/>H-Bond Acceptor: 6</p> <p><b>Chemical/Bio-activity</b><br/>miLogP: 2.997<br/>GPCR ligand: -0.08<br/>Ion channel Modulator: -0.10<br/>Kinase inhibitor: 0.01<br/>Nuclear receptor Ligand: 0.29</p>      | <p><b>Hex Score:</b></p> <p><b>Energy minimized (Kcal/mol)</b><br/>37.06</p> <p><b>Quantum Score:</b></p> <p><b>Gibbs free energy (kcal/mol)</b><br/>-27.32</p>  | <p><b>Amino acid base</b></p> <p><b>Docking results (E-Total)</b><br/>-258.48</p> <p><b>Rank: SECOND</b></p> <p><b>Root Mean Square Deviation (A°)</b><br/>39.09</p> | <p><b>H-Bond (A°)</b><br/>LEU 32, GLY 59</p> | <p><b>distance</b><br/>1.56,<br/>2.17</p>      |
| 6. | Costus spicatus<br>(Tamarixetin)<br>Structure of the compound<br>CID: 5281699         |  | <p><b>Lipinski Rule:</b><br/>Molecular Weight : 316.26228 [g/mol]<br/>Molecular Formula : C<sub>16</sub>H<sub>12</sub>O<sub>7</sub><br/>XLogP3-AA : 1.9<br/>H-Bond Donor : 4<br/>H-Bond Acceptor : 7</p> <p><b>Chemical/Bio-activity</b><br/>miLogP: 1.99<br/>GPCR ligand: -0.10<br/>Ion channel Modulator: -0.26<br/>Kinase inhibitor: 0.25<br/>Nuclear receptor Ligand: 0.28</p> | <p><b>Hex Score:</b></p> <p><b>Energy minimized (Kcal/mol)</b><br/>-17.56</p> <p><b>Quantum Score:</b></p> <p><b>Gibbs free energy (kcal/mol)</b><br/>-15.65</p> | <p><b>Amino acid base</b></p> <p><b>Docking results (E-Total)</b><br/>-258.00</p> <p><b>Rank: FIFTH</b></p> <p><b>Root Mean Square Deviation (A°)</b><br/>19.70</p>  | <p><b>H-Bond (A°)</b><br/>ILE 25</p>         | <p><b>distance</b><br/>1<br/>.<br/>5<br/>4</p> |

**Table 2:** Pharmacokinetic and pharmodynamic studies for AhG compounds on various body organelles.

| Sl. No. | Compound       | ADME Properties       |            |                                |                        |       | Toxicity Properties |                |                |                |                 |                 |
|---------|----------------|-----------------------|------------|--------------------------------|------------------------|-------|---------------------|----------------|----------------|----------------|-----------------|-----------------|
|         |                | Oral Availability     | Solubility | Drug binding to plasma protein | Volume of Distribution | AMES  | Health effect       |                |                |                |                 |                 |
|         |                |                       |            |                                |                        |       | B <sup>a</sup>      | C <sup>a</sup> | G <sup>a</sup> | K <sup>a</sup> | Lj <sup>a</sup> | Lu <sup>a</sup> |
| Drug    | Glipizide      | %F(Oral) > 30%: 0.886 | -3.15      | %PPB: 99.13%                   | 0.19 L/kg              | 0.000 | 0.46                | 0.92           | 0.97           | 0.31           | 0.28            | 0.23            |
| 1       | Aloins         | %F(Oral) > 70%: 0.732 |            | LogKa HSA : 4.86               |                        |       |                     |                |                |                |                 |                 |
|         |                | %F(Oral) > 30%: 0.086 | -3.53      | %PPB: 15.83%                   | 1.29 L/kg              | 0.739 | 0.20                | 0.85           | 0.35           | 0.30           | 0.18            | 0.20            |
|         |                | %F(Oral) > 70%: 0.040 |            | LogKa HSA: 2.94                |                        |       |                     |                |                |                |                 |                 |
| 2       | Capparisi-nine | %F(Oral) > 30%: 0.729 | -2.13      | %PPB: 61.93%                   | 3.42 L/kg              | 0.207 | 0.00                | 0.02           | 0.92           | 0.18           | 0.14            | 0.00            |
|         |                | %F(Oral) > 70%: 0.521 |            | LogKa HSA: 3.92                |                        |       |                     |                |                |                |                 |                 |
| 3       | Funiculosin    | %F(Oral) > 30%: 0.773 | -3.66      | %PPB: 98.55%                   | 0.36 L/kg              | 0.018 | 0.98                | 0.99           | 0.99           | 0.97           | 0.94            | 0.99            |
|         |                | %F(Oral) > 70%: 0.148 |            | LogKa HSA: 4.04                |                        |       |                     |                |                |                |                 |                 |
| 4       | Rhein          | %F(Oral) > 30%: 0.296 | -2.99      | %PPB: 97.49%                   | 0.23 L/kg              | 0.977 | 0.15                | 0.34           | 0.23           | 0.09           | 0.06            | 0.41            |
|         |                | %F(Oral) > 70%: 0.080 |            | LogKa HSA: 5.16                |                        |       |                     |                |                |                |                 |                 |

B<sup>a</sup>= Blood; C<sup>a</sup>= Cardiovascular system; G<sup>a</sup>= Gastrointestinal system; K<sup>a</sup>= Kidney; Lj<sup>a</sup>= Liver; Lu<sup>a</sup>= Lungs
